# Supplementary material for: FOXO transcriptional activity is associated with response to chemoradiation in EAC
Source: Springer Nature journal article supplement (doi:10.1186/s12967-022-03376-w), 2022-04-25

**A**

**Fitzgerald EAC n = 76**

$R = 0.554$   $p = 2.05e-07$

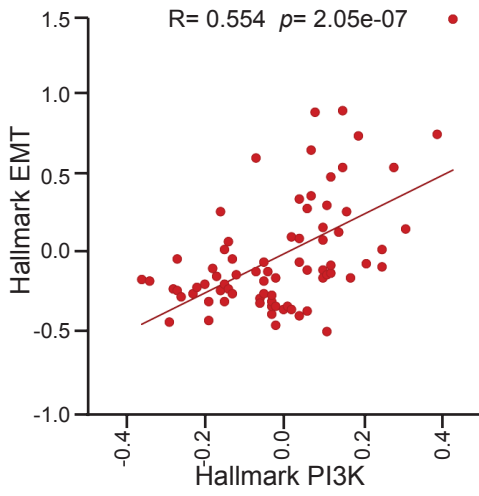

**TCGA n = 184**

$R = 0.174$   $p = 0.018$

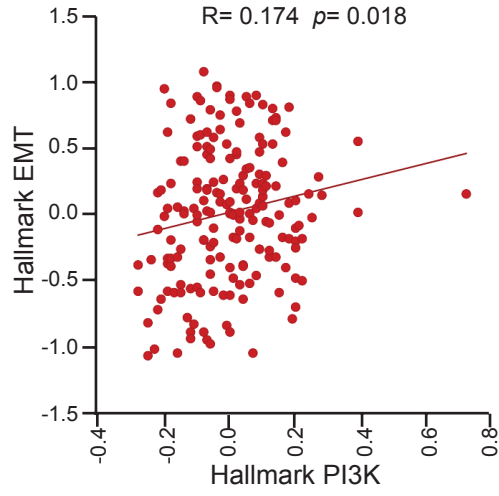

**TCGA EAC n = 89**

$R = 0.273$   $p = 0.009$

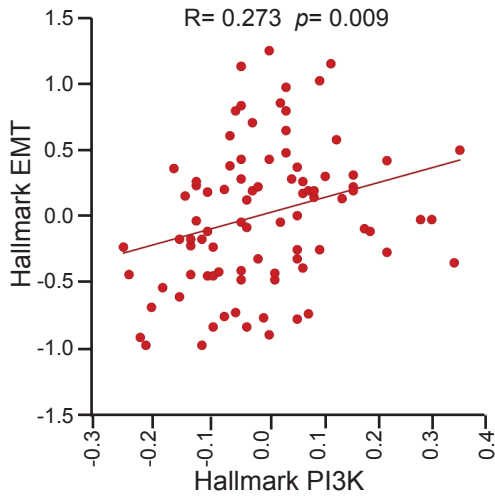

**TCGA ESC n = 95**

$R = -0.129$   $p = 0.213$

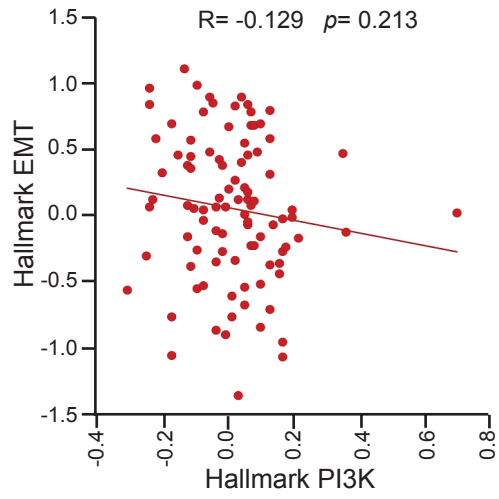

**B**

**031M**

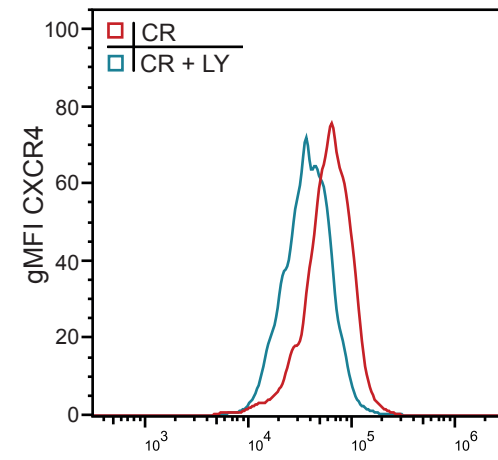

**289B**

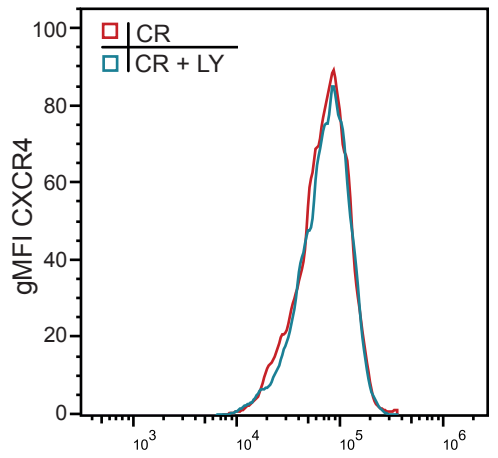

Supplement: MOESM3 [file 20341920]
