# Supplementary material for: FOXO transcriptional activity is associated with response to chemoradiation in EAC
Source: Springer Nature journal article supplement (doi:10.1186/s12967-022-03376-w), 2022-04-25

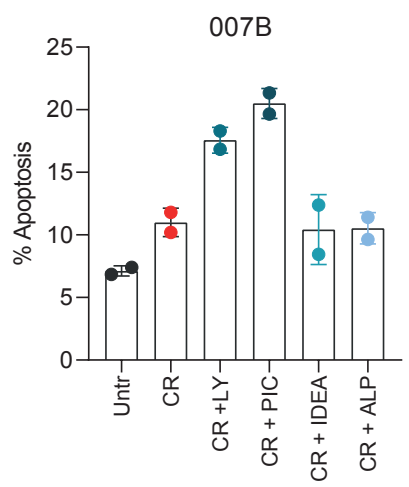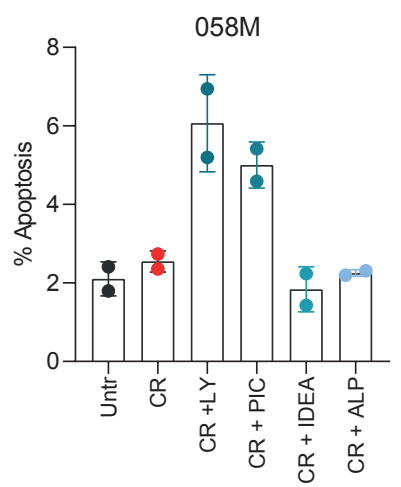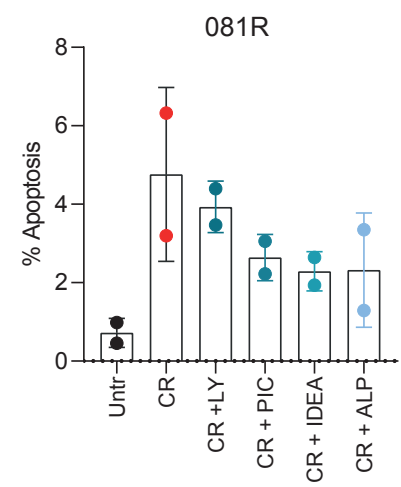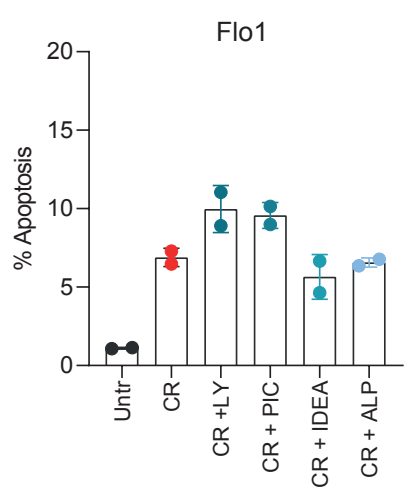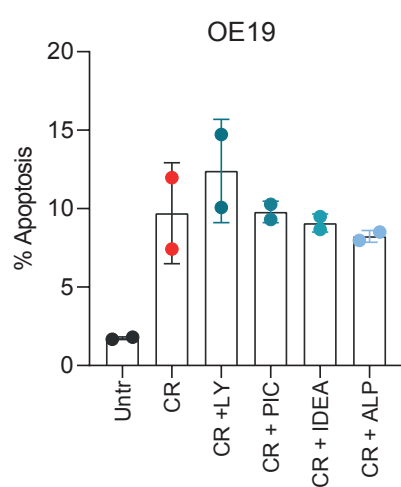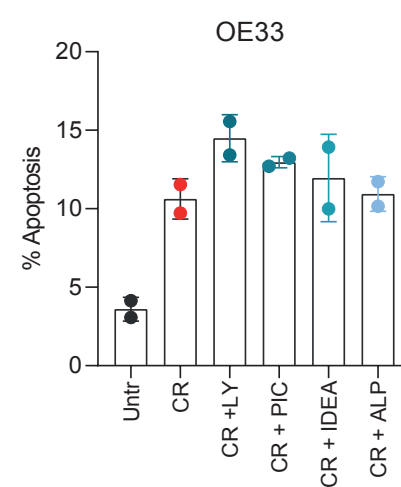

Supplement: MOESM4 [file 20341920]
